# Supplementary material for: Identification and Characterization of Small Noncoding RNAs in Genome Sequences of the Edible Fungus Pleurotus ostreatus
Source: Biomed Res Int. 2016 Sep 15;2016:2503023. doi: 10.1155/2016/2503023 (PMC5040776; doi:10.1155/2016/2503023)
Supplement: Supplementary file 1 — Supplemental Table 1: Comparison of genomic features for edible fungi. Supplemental Table 2: General information of tRNAs in the genome assembly of CCEF00389. Supplemental Table 3: Location of tRNAs in the genome assembly of CCEF00389. Supplemental Table 4: Identities of matches of tRNA between P. ostreatus CCEF00389 and some other Agaricomycotina fungi. There are 57 of them highly conserved among Agaricomycotina fungi. [file 2503023.f1.zip]

Archive with 4 entries (4 files):
- supplement table 1.xlsx
- supplement table 2.xlsx
- supplement table 3.xls
- supplement table 4.xls
