# Supplementary material for: Identification and Characterization of Small Noncoding RNAs in Genome Sequences of the Edible Fungus Pleurotus ostreatus
Source: Biomed Res Int. 2016 Sep 15;2016:2503023. doi: 10.1155/2016/2503023 (PMC5040776; doi:10.1155/2016/2503023)
Supplement: Supplementary file 1 — Supplemental Table 1: Comparison of genomic features for edible fungi. Supplemental Table 2: General information of tRNAs in the genome assembly of CCEF00389. Supplemental Table 3: Location of tRNAs in the genome assembly of CCEF00389. Supplemental Table 4: Identities of matches of tRNA between P. ostreatus CCEF00389 and some other Agaricomycotina fungi. There are 57 of them highly conserved among Agaricomycotina fungi. [file 2503023.f1.zip › supplement table 1.xlsx]

## Sheet: Sheet1
	Pleurotus ostreatus CCEF00389	Agaricus bisporus	Volvariella volvacea	Flammulina velutipes
genome size（Mbp）	35.8	30.2	36.45	35.6
number of predicted genes	13438	10438	11084	12218
average protein length（bp）	442	426	524	453
GC content (%)	49.54	45.17	48.86	48.99
