# Supplementary material for: Identification and Characterization of Small Noncoding RNAs in Genome Sequences of the Edible Fungus Pleurotus ostreatus
Source: Biomed Res Int. 2016 Sep 15;2016:2503023. doi: 10.1155/2016/2503023 (PMC5040776; doi:10.1155/2016/2503023)
Supplement: Supplementary file 1 — Supplemental Table 1: Comparison of genomic features for edible fungi. Supplemental Table 2: General information of tRNAs in the genome assembly of CCEF00389. Supplemental Table 3: Location of tRNAs in the genome assembly of CCEF00389. Supplemental Table 4: Identities of matches of tRNA between P. ostreatus CCEF00389 and some other Agaricomycotina fungi. There are 57 of them highly conserved among Agaricomycotina fungi. [file 2503023.f1.zip › supplement table 2.xlsx]

## Sheet: tRNA
Scaffold_ID	tRNA_ID	tRNA_begin	bounds end	tRNA type	anticodon
scaffold_4	tRna_1	178395	178490	Lys	TTT
scaffold_4	tRna_2	767408	767500	Ser	TGA
scaffold_4	tRna_3	179205	179114	Lys	CTT
scaffold_11	tRna_4	228811	228725	Arg	CCT
scaffold_12	tRna_5	372812	372894	Arg	TCG
scaffold_12	tRna_6	755640	755724	Arg	TCT
scaffold_12	tRna_7	962914	963023	Leu	CAA
scaffold_12	tRna_8	375652	375570	Arg	TCG
scaffold_14	tRna_9	35629	35719	Ser	CGA
scaffold_14	tRna_10	385901	385802	Pro	CGG
scaffold_14	tRna_11	303577	303485	Ala	CGC
scaffold_14	tRna_12	36020	35949	Arg	ACG
scaffold_15	tRna_13	211702	211620	Cys	GCA
scaffold_16	tRna_14	57511	57583	Ala	AGC
scaffold_19	tRna_15	314833	314916	Glu	CTC
scaffold_19	tRna_16	372303	372387	Glu	CTC
scaffold_19	tRna_17	315218	315135	Glu	CTC
scaffold_19	tRna_18	199903	199810	Leu	TAA
scaffold_24	tRna_19	289591	289490	Pro	CGG
scaffold_25	tRna_20	72925	73033	Leu	AAG
scaffold_25	tRna_21	68160	68088	Phe	GAA
scaffold_27	tRna_22	94698	94771	Ile	AAT
scaffold_27	tRna_23	446605	446523	Asp	GTC
scaffold_27	tRna_24	441248	441156	Asp	GTC
scaffold_27	tRna_25	54845	54759	Asn	GTT
scaffold_27	tRna_26	27689	27604	Asn	GTT
scaffold_29	tRna_27	38635	38730	Thr	AGT
scaffold_29	tRna_28	44679	44785	Thr	AGT
scaffold_29	tRna_29	46235	46331	Thr	CGT
scaffold_29	tRna_30	47097	47213	Thr	TGT
scaffold_29	tRna_31	77155	77250	Thr	AGT
scaffold_29	tRna_32	98638	98711	Val	AAC
scaffold_29	tRna_33	187375	187291	Gly	GCC
scaffold_30	tRna_34	2817	2889	Ala	AGC
scaffold_30	tRna_35	31128	31219	Asp	GTC
scaffold_30	tRna_36	146023	146113	Gly	TCC
scaffold_34	tRna_37	6204	6275	Met	CAT
scaffold_34	tRna_38	9053	9132	Gly	GCC
scaffold_34	tRna_39	490477	490555	Glu	TTC
scaffold_34	tRna_40	493595	493672	Glu	TTC
scaffold_34	tRna_41	504388	504485	Asn	GTT
scaffold_34	tRna_42	577163	577234	Met	CAT
scaffold_34	tRna_43	713850	713769	Arg	ACG
scaffold_34	tRna_44	488817	488739	Glu	TTC
scaffold_34	tRna_45	488615	488512	Leu	AAG
scaffold_42	tRna_46	346707	346778	Asp	GTC
scaffold_42	tRna_47	416845	416927	Asp	GTC
scaffold_42	tRna_48	431580	431663	Asp	GTC
scaffold_42	tRna_49	425837	425754	Asp	GTC
scaffold_42	tRna_50	69134	69052	Arg	TCG
scaffold_47	tRna_51	346158	346229	Met	CAT
scaffold_47	tRna_52	315361	315274	Tyr	GTA
scaffold_47	tRna_53	276904	276832	Arg	CCG
scaffold_59	tRna_54	504235	504328	Ser	GCT
scaffold_59	tRna_55	778450	778532	Gln	TTG
scaffold_67	tRna_56	383757	383675	Gly	GCC
scaffold_67	tRna_57	374199	374122	Gly	GCC
scaffold_71	tRna_58	190262	190175	His	GTG
scaffold_71	tRna_59	178438	178343	Trp	CCA
scaffold_75	tRna_60	6486	6575	Ala	TGC
scaffold_75	tRna_61	11059	10968	Ala	AGC
scaffold_75	tRna_62	8925	8837	Ala	AGC
scaffold_75	tRna_63	8513	8427	Ala	TGC
scaffold_78	tRna_64	19908	19987	Leu	CAG
scaffold1	tRna_65	324183	324274	Leu	TAG
scaffold1	tRna_66	351853	351934	His	GTG
scaffold1	tRna_67	894009	894111	Ser	GCT
scaffold1	tRna_68	1181519	1181602	Ile	TAT
scaffold3	tRna_69	25296	25378	Gln	CTG
scaffold3	tRna_70	218972	219056	His	GTG
scaffold3	tRna_71	219239	219323	His	GTG
scaffold3	tRna_72	962948	962861	Tyr	GTA
scaffold3	tRna_73	954612	954541	Arg	ACG
scaffold3	tRna_74	485468	485388	Pro	TGG
scaffold3	tRna_75	333246	333173	Val	AAC
scaffold3	tRna_76	40699	40621	Gly	TCC
scaffold7	tRna_77	80387	80459	Ala	AGC
scaffold7	tRna_78	286005	286077	Thr	AGT
scaffold7	tRna_79	566385	566492	Leu	AAG
scaffold7	tRna_80	599908	599989	Pro	AGG
scaffold7	tRna_81	779421	779507	Pro	AGG
scaffold7	tRna_82	285897	285825	Thr	AGT
scaffold7	tRna_83	87501	87429	Ala	AGC
scaffold8	tRna_84	390607	390694	Lys	CTT
scaffold8	tRna_85	537583	537665	Lys	CTT
scaffold8	tRna_86	593949	594032	Thr	TGT
scaffold10	tRna_87	467172	467254	Gln	TTG
scaffold10	tRna_88	467266	467349	Gln	TTG
scaffold10	tRna_89	379057	378980	Gly	GCC
scaffold10	tRna_90	223794	223710	Phe	GAA
scaffold10	tRna_91	214314	214221	Asn	GTT
scaffold13	tRna_92	306203	306287	Glu	CTC
scaffold13	tRna_93	514659	514580	Gly	GCC
scaffold13	tRna_94	90481	90377	Ser	AGA
scaffold14	tRna_95	416667	416810	Ile	AAT
scaffold14	tRna_96	319552	319449	Trp	CCA
scaffold14	tRna_97	108754	108672	Arg	TCG
scaffold14	tRna_98	69063	68991	Ala	AGC
scaffold15	tRna_99	337525	337435	Gly	TCC
scaffold16	tRna_100	288272	288358	Tyr	GTA
scaffold16	tRna_101	424411	424483	Cys	GCA
scaffold17	tRna_102	337262	337344	Gly	CCC
scaffold17	tRna_103	343067	343147	Gly	CCC
scaffold19	tRna_104	254505	254577	Phe	GAA
scaffold19	tRna_105	100606	100534	Phe	GAA
scaffold21	tRna_106	320552	320636	Lys	TTT
scaffold21	tRna_107	291522	291442	Arg	ACG
scaffold23	tRna_108	155359	155438	Val	AAC
scaffold23	tRna_109	102060	101987	Val	AAC
scaffold25	tRna_110	330240	330331	Gly	TCC
scaffold31	tRna_111	104891	104791	Ser	AGA
scaffold31	tRna_112	82257	82162	Ser	AGA
scaffold31	tRna_113	82089	81994	Ser	AGA
scaffold33	tRna_114	122218	122291	Ile	AAT
scaffold33	tRna_115	144696	144769	Ile	AAT
scaffold33	tRna_116	145968	146041	Ile	AAT
scaffold33	tRna_117	235187	235274	Lys	CTT
scaffold33	tRna_118	304367	304439	Ala	AGC
scaffold33	tRna_119	251955	251867	Leu	CAG
scaffold33	tRna_120	111611	111529	Pro	TGG
scaffold34	tRna_121	62151	62239	Lys	CTT
scaffold34	tRna_122	138963	138860	Leu	AAG
scaffold34	tRna_123	83297	83203	Lys	CTT
scaffold34	tRna_124	67963	67881	Lys	TTT
scaffold35	tRna_125	164051	164139	Gln	CTG
scaffold35	tRna_126	216423	216515	Ser	GCT
scaffold35	tRna_127	292581	292653	Ala	AGC
scaffold35	tRna_128	294838	294766	Ala	AGC
scaffold37	tRna_129	271817	271720	Pro	AGG
scaffold40	tRna_130	10934	11019	Gly	TCC
scaffold40	tRna_131	261697	261783	Val	AAC
scaffold40	tRna_132	261567	261490	Glu	TTC
scaffold43	tRna_133	253486	253567	Asp	GTC
scaffold43	tRna_134	203619	203527	Ser	TGA
scaffold43	tRna_135	203323	203231	Ser	CGA
scaffold46	tRna_136	158116	158187	Thr	CGT
scaffold49	tRna_137	145986	145898	Gln	CTG
scaffold51	tRna_138	63430	63357	Ile	AAT
scaffold53	tRna_139	27362	27291	Thr	TGT
scaffold54	tRna_140	90446	90360	Ala	AGC
scaffold57	tRna_141	84607	84691	Ala	AGC
scaffold57	tRna_142	105071	105153	Val	TAC
scaffold57	tRna_143	91538	91453	Val	CAC
scaffold57	tRna_144	88062	87978	Ala	AGC
scaffold57	tRna_145	84919	84836	Pro	TGG
scaffold59	tRna_146	18528	18448	Gly	GCC
scaffold61	tRna_147	155506	155421	Thr	AGT
scaffold65	tRna_148	53983	54054	Thr	CGT
scaffold69	tRna_149	76643	76540	Met	CAT
scaffold71	tRna_150	65081	64979	Ala	CGC
scaffold72	tRna_151	49639	49742	Met	CAT
scaffold79	tRna_152	61372	61454	Val	CAC
scaffold85	tRna_153	24345	24258	Val	TAC
scaffold103	tRna_154	17590	17699	Leu	CAA
scaffold120	tRna_155	32553	32639	Ala	AGC
scaffold144	tRna_156	4490	4575	Asn	GTT
scaffold156	tRna_157	18517	18414	Met	CAT
scaffold159	tRna_158	17482	17399	Tyr	GTA
scaffold182	tRna_159	4623	4695	Ala	AGC
scaffold195	tRna_160	5902	5830	Ala	AGC
scaffold197	tRna_161	3940	3868	Ala	AGC
scaffold210	tRna_162	3205	3133	Ala	AGC
scaffold226	tRna_163	2994	3066	Ala	AGC
scaffold240	tRna_164	3286	3214	Ala	AGC
scaffold247	tRna_165	1381	1453	Ala	AGC
scaffold247	tRna_166	458	386	Ala	AGC
scaffold251	tRna_167	3318	3247	Ala	AGC
scaffold265	tRna_168	2864	2794	Arg	TCT
scaffold294	tRna_169	298	380	Pseudo	TAG
scaffold294	tRna_170	1022	1095	Arg	TCG
scaffold295	tRna_171	260	345	Ser	TGA
scaffold330	tRna_172	446	374	Ala	AGC
scaffold339	tRna_173	502	430	Ala	AGC
scaffold535	tRna_174	918	990	Ala	AGC
scaffold597	tRna_175	262	346	Glu	CTC
scaffold601	tRna_176	683	755	Ala	AGC
scaffold716	tRna_177	928	856	Lys	TTT
scaffold1065	tRna_178	233	305	Ala	AGC
scaffold1240	tRna_179	557	630	Ala	AGC
scaffold1303	tRna_180	632	561	Gly	TCC
scaffold1662	tRna_181	304	376	Met	CAT
scaffold1776	tRna_182	243	315	Ala	AGC
scaffold2037	tRna_183	78	150	Asp	GTC
scaffold2221	tRna_184	85	13	Ala	AGC
scaffold2584	tRna_185	181	253	Ala	AGC
