# Supplementary material for: Identification and Characterization of Small Noncoding RNAs in Genome Sequences of the Edible Fungus Pleurotus ostreatus
Source: Biomed Res Int. 2016 Sep 15;2016:2503023. doi: 10.1155/2016/2503023 (PMC5040776; doi:10.1155/2016/2503023)
Supplement: Supplementary file 1 — Supplemental Table 1: Comparison of genomic features for edible fungi. Supplemental Table 2: General information of tRNAs in the genome assembly of CCEF00389. Supplemental Table 3: Location of tRNAs in the genome assembly of CCEF00389. Supplemental Table 4: Identities of matches of tRNA between P. ostreatus CCEF00389 and some other Agaricomycotina fungi. There are 57 of them highly conserved among Agaricomycotina fungi. [file 2503023.f1.zip › supplement table 3.xls]

## Sheet: Sheet1
ID	location	strand	distance to gene boundary	neighbour
tRNA1	scaffold_4_178395-178490	+	207	g161
tRNA2	scaffold_4_767408-767500	+	104	g421
tRNA3	scaffold_4_179114-179205	-	661	g162
tRNA4	scaffold_11_228725-228811	-	281	g934
tRNA5	scaffold_12_372812-372894	+	65	g1160
tRNA6	scaffold_12_755640-755724	+	78	g1303
tRNA7	scaffold_12_962914-963023	+	intron	g1382
tRNA8	scaffold_12_375570-375652	-	143	g1161
tRNA9	scaffold_14_35629-35719	+	389	g1524
tRNA10	scaffold_14_385802-385901	-	intron	g1680
tRNA11	scaffold_14_303485-303577	-	395	g1644
tRNA12	scaffold_14_35949-36020	-	88	g1524
tRNA13	scaffold_15_211620-211702	-	96	g1779
tRNA14	scaffold_16_57511-57583	+	4008	g1948
tRNA15	scaffold_19_314833-314916	+	148	g2145
tRNA16	scaffold_19_372303-372387	+	182	g2166
tRNA17	scaffold_19_315135-315218	-	450	g2145
tRNA18	scaffold_19_199810-199903	-	96	g2099
tRNA19	scaffold_24_289490-289591	-	intron	g2662
tRNA20	scaffold_25_72925-73033	+	553	g2721
tRNA21	scaffold_25_68088-68160	-	121	g2719
tRNA22	scaffold_27_94698-94771	+	163	g2830
tRNA23	scaffold_27_446523-446605	-	90	g2967
tRNA24	scaffold_27_441156-441248	-	273	g2966
tRNA25	scaffold_27_54759-54845	-	52	g2816
tRNA26	scaffold_27_27604-27689	-	99	g2805
tRNA27	scaffold_29_38635-38730	+	341	g3054
tRNA28	scaffold_29_44679-44785	+	2708	g3054
tRNA29	scaffold_29_46235-46331	+	1981	g3055
tRNA30	scaffold_29_47097-47213	+	1099	g3055
tRNA31	scaffold_29_77155-77250	+	2373	g3062
tRNA32	scaffold_29_98638-98711	+	230	g3069
tRNA33	scaffold_29_187291-187375	-	231	g3104
tRNA34	scaffold_30_2817-2889	+	271	g3149
tRNA35	scaffold_30_31128-31219	+	148	g3156
tRNA36	scaffold_30_146023-146113	+	154	g3195
tRNA37	scaffold_34_6204-6275	+	464	g3330
tRNA38	scaffold_34_9053-9132	+	intron	g3330
tRNA39	scaffold_34_490477-490555	+	101	g3516
tRNA40	scaffold_34_493595-493672	+	71	g3518
tRNA41	scaffold_34_504388-504485	+	intron	g3523
tRNA42	scaffold_34_577163-577234	+	47	g3545
tRNA43	scaffold_34_713769-713850	-	0	g3590
tRNA44	scaffold_34_488739-488817	-	170	g3516
tRNA45	scaffold_34_488512-488615	-	251	g3515
tRNA46	scaffold_42_346707-346778	+	36	g6751
tRNA47	scaffold_42_416845-416927	+	117	g6775
tRNA48	scaffold_42_431580-431663	+	206	g6781
tRNA49	scaffold_42_425754-425837	-	370	g6779
tRNA50	scaffold_42_69052-69134	-	180	g6662
tRNA51	scaffold_47_346158-346229	+	139	g6973
tRNA52	scaffold_47_315274-315361	-	intron	g6956
tRNA53	scaffold_47_276832-276904	-	250	g6937
tRNA54	scaffold_59_504235-504328	+	266	g7377
tRNA55	scaffold_59_778450-778532	+	100	g7467
tRNA56	scaffold_67_383675-383757	-	34	g7756
tRNA57	scaffold_67_374122-374199	-	88	g7751
tRNA58	scaffold_71_190175-190262	-	intron	g7886
tRNA59	scaffold_71_178343-178438	-	373	g7882
tRNA60	scaffold_75_6486-6575	+	40	g7920
tRNA61	scaffold_75_10968-11059	-	160	g7921
tRNA62	scaffold_75_8837-8925	-	244	g7921
tRNA63	scaffold_75_8427-8513	-	287	g7920
tRNA64	scaffold_78_19908-19987	+	100	g8079
tRNA65	scaffold1_324183-324274	+	143	g8329
tRNA66	scaffold1_351853-351934	+	54	g8344
tRNA67	scaffold1_894009-894111	+	63	g8555
tRNA68	scaffold1_1181519-1181602	+	141	g8669
tRNA69	scaffold3_25296-25378	+	117	g8731
tRNA70	scaffold3_218972-219056	+	91	g8802
tRNA71	scaffold3_219239-219323	+	185	g8803
tRNA72	scaffold3_962861-962948	-	61	g9137
tRNA73	scaffold3_954541-954612	-	210	g9135
tRNA74	scaffold3_485388-485468	-	160	g8920
tRNA75	scaffold3_333173-333246	-	146	g8850
tRNA76	scaffold3_40621-40699	-	308	g8736
tRNA77	scaffold7_80387-80459	+	0	g9191
tRNA78	scaffold7_286005-286077	+	40	g9263
tRNA79	scaffold7_566385-566492	+	148	g9376
tRNA80	scaffold7_599908-599989	+	134	g9390
tRNA81	scaffold7_779421-779507	+	63	g9453
tRNA82	scaffold7_285825-285897	-	220	g9263
tRNA83	scaffold7_87429-87501	-	128	g9193
tRNA84	scaffold8_390607-390694	+	30	g9597
tRNA85	scaffold8_537583-537665	+	intron	g9645
tRNA86	scaffold8_593949-594032	+	intron	g9666
tRNA87	scaffold10_467172-467254	+	135	g9912
tRNA88	scaffold10_467266-467349	+	185	g9913
tRNA89	scaffold10_378980-379057	-	95	g9880
tRNA90	scaffold10_223710-223794	-	intron	g9820
tRNA91	scaffold10_214221-214314	-	176	g9818
tRNA92	scaffold13_306203-306287	+	354	g10097
tRNA93	scaffold13_514580-514659	-	223	g10175
tRNA94	scaffold13_90377-90481	-	394	g10023
tRNA95	scaffold14_416667-416810	+	132	g10342
tRNA96	scaffold14_319449-319552	-	406	g10300
tRNA97	scaffold14_108672-108754	-	87	g10222
tRNA98	scaffold14_68991-69063	-	662	g10205
tRNA99	scaffold15_337435-337525	-	intron	g10512
tRNA100	scaffold16_288272-288358	+	206	g10670
tRNA101	scaffold16_424411-424483	+	666	g10725
tRNA102	scaffold17_337262-337344	+	162	g10862
tRNA103	scaffold17_343067-343147	+	196	g10863
tRNA104	scaffold19_254505-254577	+	87	g11192
tRNA105	scaffold19_100534-100606	-	117	g11116
tRNA106	scaffold21_320552-320636	+	383	g11377
tRNA107	scaffold21_291442-291522	-	365	g11370
tRNA108	scaffold23_155359-155438	+	266	g11464
tRNA109	scaffold23_101987-102060	-	162	g11444
tRNA110	scaffold25_330240-330331	+	171	g11688
tRNA111	scaffold31_104791-104891	-	136	g11880
tRNA112	scaffold31_82162-82257	-	155	g11872
tRNA113	scaffold31_81994-82089	-	114	g11871
tRNA114	scaffold33_122218-122291	+	553	g12138
tRNA115	scaffold33_144696-144769	+	162	g12149
tRNA116	scaffold33_145968-146041	+	157	g12150
tRNA117	scaffold33_235187-235274	+	377	g12189
tRNA118	scaffold33_304367-304439	+	intron	g12219
tRNA119	scaffold33_251867-251955	-	94	g12196
tRNA120	scaffold33_111529-111611	-	452	g12134
tRNA121	scaffold34_62151-62239	+	902	g12243
tRNA122	scaffold34_138860-138963	-	175	g12274
tRNA123	scaffold34_83203-83297	-	224	g12251
tRNA124	scaffold34_67881-67963	-	215	g12245
tRNA125	scaffold35_164051-164139	+	82	g12410
tRNA126	scaffold35_216423-216515	+	160	g12430
tRNA127	scaffold35_292581-292653	+	intron	g12460
tRNA128	scaffold35_294766-294838	-	124	g12461
tRNA129	scaffold37_271720-271817	-	144	g12572
tRNA130	scaffold40_10934-11019	+	534	g12671
tRNA131	scaffold40_261697-261783	+	319	g12771
tRNA132	scaffold40_261490-261567	-	290	g12770
tRNA133	scaffold43_253486-253567	+	108	g12972
tRNA134	scaffold43_203527-203619	-	466	g12953
tRNA135	scaffold43_203231-203323	-	170	g12953
tRNA136	scaffold46_158116-158187	+	673	g13102
tRNA137	scaffold49_145898-145986	-	430	g13268
tRNA138	scaffold51_63357-63430	-	29	g13317
tRNA139	scaffold53_27291-27362	-	140	g13367
tRNA140	scaffold54_90360-90446	-	50	g3679
tRNA141	scaffold57_84607-84691	+	322	g3756
tRNA142	scaffold57_105071-105153	+	intron	g3763
tRNA143	scaffold57_91453-91538	-	218	g3759
tRNA144	scaffold57_87978-88062	-	49	g3757
tRNA145	scaffold57_84836-84919	-	94	g3756
tRNA146	scaffold59_18448-18528	-	341	g3872
tRNA147	scaffold61_155421-155506	-	82	g4072
tRNA148	scaffold65_53983-54054	+	236	g4213
tRNA149	scaffold69_76540-76643	-	300	g4277
tRNA150	scaffold71_64979-65081	-	144	g4330
tRNA151	scaffold72_49639-49742	+	206	g4372
tRNA152	scaffold79_61372-61454	+	131	g4589
tRNA153	scaffold85_24258-24345	-	166	g4647
tRNA154	scaffold103_17590-17699	+	110	g4989
tRNA155	scaffold120_32553-32639	+	253	g5264
tRNA156	scaffold144_4490-4575	+	1994	g5410
tRNA157	scaffold156_18414-18517	-	358	g5489
tRNA158	scaffold159_17399-17482	-	intron	g5499
tRNA159	scaffold182_4623-4695	+	817	g5569
tRNA160	scaffold195_5830-5902	-	intron	g5595
tRNA161	scaffold197_3868-3940	-	129	g5600
tRNA162	scaffold210_3133-3205	-	124	g5618
tRNA163	scaffold226_2994-3066	+	316	g5637
tRNA164	scaffold240_3214-3286	-	434	g5657
tRNA165	scaffold247_1381-1453	+
tRNA166	scaffold247_386-458	-
tRNA167	scaffold251_3247-3318	-	147	g5665
tRNA168	scaffold265_2794-2864	-
tRNA169	scaffold294_298-380	+
tRNA170	scaffold294_1022-1095	+
tRNA171	scaffold295_260-345	+
tRNA172	scaffold330_374-446	-	234	g5736
tRNA173	scaffold339_430-502	-
tRNA174	scaffold535_918-990	+
tRNA175	scaffold597_262-346	+
tRNA176	scaffold601_683-755	+
tRNA177	scaffold716_856-928	-
tRNA178	scaffold1065_233-305	+
tRNA179	scaffold1240_557-630	+	189	g6261
tRNA180	scaffold1303_561-632	-
tRNA181	scaffold1662_304-376	+
tRNA182	scaffold1776_243-315	+
tRNA183	scaffold2037_78-150	+
tRNA184	scaffold2221_13-85	-
tRNA185	scaffold2584_181-253	+
