# Supplementary material for: Identification and Characterization of Small Noncoding RNAs in Genome Sequences of the Edible Fungus Pleurotus ostreatus
Source: Biomed Res Int. 2016 Sep 15;2016:2503023. doi: 10.1155/2016/2503023 (PMC5040776; doi:10.1155/2016/2503023)
Supplement: Supplementary file 1 — Supplemental Table 1: Comparison of genomic features for edible fungi. Supplemental Table 2: General information of tRNAs in the genome assembly of CCEF00389. Supplemental Table 3: Location of tRNAs in the genome assembly of CCEF00389. Supplemental Table 4: Identities of matches of tRNA between P. ostreatus CCEF00389 and some other Agaricomycotina fungi. There are 57 of them highly conserved among Agaricomycotina fungi. [file 2503023.f1.zip › supplement table 4.xls]

## Sheet: Sheet1
tRNA_ID	A. bisporus	F. velutipes	C. cinerea	V. volvacea	S. commune	P. ostreatus PC15	U. maydis
tRNA1	87.5	88.54	89.58	85.57	89.8	100	0
tRNA2	92.13	0	93.26	93.26	0	100	0
tRNA3	91.4	91.3	91.3	86	92.39	100	0
tRNA4	0	0	80.65	0	0	100	0
tRNA5	94.05	96.43	92.86	94.05	90.36	100	0
tRNA6	83.15	0	97.37	97.37	0	98.82	0
tRNA7	0	100	96.15	0	0	100	0
tRNA8	94.05	96.43	92.86	94.05	90.36	100	0
tRNA9	0	0	0	0	0	100	100
tRNA10	0	0	0	0	0	92.16	0
tRNA11	0	0	0	97.22	97.3	90.2	0
tRNA12	100	100	87.32	97.22	88.61	100	0
tRNA13	100	83.13	0	0	84.34	98.8	0
tRNA15	97.14	89.77	92.05	82.98	91.67	98.81	0
tRNA16	97.14	89.77	91.01	81.91	90.59	97.65	0
tRNA17	97.14	89.77	92.05	82.98	91.67	98.81	0
tRNA18	87.88	0	92.71	89.11	0	98.94	0
tRNA19	0	0	0	0	0	97.06	0
tRNA20	0	0	0	0	93.18	99.08	0
tRNA21	0	0	0	0	91.78	100	0
tRNA22	98.65	100	98.65	98.65	0	100	0
tRNA23	90.7	90.36	92.86	0	0	97.59	0
tRNA24	85.11	84.04	89.25	0	0	100	0
tRNA25	0	0	0	0	0	98.85	0
tRNA26	0	0	0	0	0	98.84	0
tRNA27	0	0	0	0	0	86.54	0
tRNA28	0	0	0	0	0	81.65	0
tRNA30	0	0	0	0	0	100	0
tRNA31	0	0	0	0	0	83.81	0
tRNA32	100	100	94.59	98.65	95.95	100	0
tRNA33	90.59	90.59	0	87.06	88.24	98.82	0
tRNA34	0	0	0	0	0	0	0
tRNA35	86.02	86.21	88.17	0	0	98.91	0
tRNA36	0	0	0	0	0	90.43	0
tRNA37	0	0	0	94.44	0	100	0
tRNA38	85.71	86.75	0	84.34	84.15	100	0
tRNA39	91.14	95	88.61	0	89.87	98.73	0
tRNA40	92.31	95	89.74	0	91.03	98.72	0
tRNA41	0	0	0	0	0	93.88	0
tRNA42	0	0	0	94.44	0	100	0
tRNA43	93.98	93.9	89.19	89.16	92.68	98.78	0
tRNA44	91.14	95	88.61	0	89.87	97.47	0
tRNA45	95.35	83.5	85.85	88.57	82.79	99.04	0
tRNA46	98.18	90.28	94.44	0	0	100	0
tRNA47	86.67	90.91	90	0	0	98.8	0
tRNA48	88.24	90.48	90.59	0	0	97.62	0
tRNA49	87.06	90.48	91.67	0	0	100	0
tRNA50	92.41	94.52	0	92.41	90.79	97.22	0
tRNA51	0	0	0	94.44	0	100	0
tRNA52	0	0	0	0	0	96.59	0
tRNA53	0	0	0	0	0	100	0
tRNA54	88.66	0	85.29	91.58	0	100	0
tRNA55	0	0	0	0	0	97.59	0
tRNA56	87.95	87.06	0	82.76	84.71	93.02	0
tRNA57	85	84.34	0	84.15	85.37	100	0
tRNA58	0	0	0	0	0	100	0
tRNA59	0	0	0	0	82.83	94.79	0
tRNA60	0	84.16	0	0	0	97.78	0
tRNA61	0	0	0	95.45	0	96.74	0
tRNA62	0	0	0	82.02	0	97.75	0
tRNA63	87.5	83.91	0	0	0	91.01	0
tRNA64	94.87	0	88.75	93.02	92.86	100	0
tRNA65	89.47	86.96	80.85	90.22	0	100	0
tRNA66	95.18	0	95.24	0	0	100	0
tRNA67	85.44	0	86.54	86.54	0	100	0
tRNA68	0	0	0	0	0	98.81	0
tRNA69	0	0	0	0	0	100	0
tRNA70	90.59	0	92.94	0	0	100	0
tRNA71	91.76	0	93.02	0	0	97.65	0
tRNA72	0	0	0	0	0	98.86	0
tRNA73	100	100	87.32	97.22	88.61	100	0
tRNA74	0	0	93.98	0	0	100	0
tRNA75	100	98.65	95.95	97.3	95.77	100	0
tRNA76	0	0	0	0	0	100	0
tRNA78	0	0	0	0	0	100	0
tRNA79	78.99	81.31	84.55	89.81	84.55	100	0
tRNA80	90.8	90.48	93.02	94.12	95.24	100	0
tRNA81	91.95	89.66	93.18	91.01	90.8	98.85	0
tRNA82	0	0	0	0	0	100	0
tRNA84	89.47	90.91	93.41	92.13	94.44	100	0
tRNA85	91.67	94.12	91.76	96.43	92.86	100	0
tRNA86	0	0	0	0	0	96.43	0
tRNA87	0	0	0	0	0	100	0
tRNA88	0	0	0	0	0	98.81	0
tRNA89	87.5	84.34	0	82.93	85.53	100	0
tRNA90	0	0	0	0	0	100	0
tRNA91	0	0	0	0	0	96.81	0
tRNA92	97.14	92.13	91.11	81.91	90.59	100	0
tRNA93	87.65	84.34	0	83.72	82.93	96.25	0
tRNA94	88.89	77.78	0	88.89	0	94.34	0
tRNA95	100	100	100	100	0	98.61	0
tRNA96	0	0	0	0	81.73	86.67	0
tRNA97	94.05	96.43	92.86	94.05	90.36	100	0
tRNA99	0	0	0	0	0	98.9	0
tRNA100	0	0	0	0	0	94.25	0
tRNA101	100	94.52	0	0	0	100	0
tRNA102	100	0	100	100	0	100	0
tRNA103	85.51	0	85.51	85.51	0	97.53	0
tRNA104	0	0	0	0	0	100	0
tRNA105	0	0	0	0	0	100	0
tRNA106	88.89	90.67	91.78	88.89	92	98.82	0
tRNA107	97.53	95.06	89.19	86.75	92.59	98.77	0
tRNA108	100	91.25	88.75	90	88.31	97.5	0
tRNA109	100	98.65	95.95	97.3	95.77	100	0
tRNA110	0	0	0	0	0	93.48	0
tRNA111	88.12	87.25	83.93	86.14	0	99.01	0
tRNA112	89.69	91.67	84.78	89.58	0	100	0
tRNA113	89.58	90.62	82.88	89.58	0	98.96	0
tRNA114	98.65	100	98.65	98.65	0	100	0
tRNA115	98.65	100	98.65	98.65	0	100	0
tRNA116	98.65	100	98.65	98.65	0	100	0
tRNA117	93.18	91.11	92.22	88.54	95.45	100	0
tRNA119	0	0	97.5	92.31	100	100	0
tRNA120	0	0	94.12	0	0	98.8	0
tRNA121	88.76	91.11	91.01	91.01	91.01	97.75	0
tRNA122	95.35	83.5	84.91	89.52	82.79	100	0
tRNA123	88.54	89.47	88.42	89	89.47	97.89	0
tRNA124	91.67	94.25	92.94	91.76	93.02	100	0
tRNA125	0	0	0	0	0	100	0
tRNA126	93.75	0	86.27	95.74	0	98.92	0
tRNA129	87.76	82.65	85.85	86.73	84.69	96.94	0
tRNA130	0	0	0	0	0	96.51	0
tRNA131	82.47	83.91	100	88.1	100	98.85	0
tRNA132	89.33	93.67	88.64	87.01	95.06	98.72	0
tRNA133	90.59	90.24	91.67	0	0	92.77	0
tRNA134	91.01	0	90.32	90.8	0	100	0
tRNA135	86.36	0	88.51	89.77	0	91.4	0
tRNA136	0	0	0	0	0	100	0
tRNA137	0	0	0	0	0	93.68	0
tRNA138	98.65	100	98.65	98.65	0	100	0
tRNA139	0	0	0	0	0	100	0
tRNA140	89.77	86.21	0	0	0	97.7	0
tRNA141	88.51	88.24	0	0	0	100	0
tRNA142	84.34	100	91.76	85.54	0	98.8	0
tRNA143	0	0	0	0	0	98.84	0
tRNA144	88.51	88.24	0	0	0	100	0
tRNA145	0	0	93.02	0	0	98.81	0
tRNA146	87.95	85.54	0	86.59	87.06	97.56	0
tRNA147	0	0	0	0	0	100	0
tRNA148	0	0	0	0	0	100	0
tRNA149	0	0	0	0	0	98.08	0
tRNA150	0	0	0	97.22	97.3	92.23	0
tRNA151	0	0	0	0	0	94.29	0
tRNA152	0	0	0	0	0	96.39	0
tRNA153	79.79	97.22	94.74	85.37	94.74	94.32	0
tRNA154	0	100	96.15	0	0	99.09	0
tRNA155	88.64	86.21	0	0	0	96.55	0
tRNA156	0	0	0	0	0	94.32	0
tRNA157	0	0	0	0	0	99.04	0
tRNA158	0	0	0	0	0	100	0
tRNA175	97.14	89.89	90.91	82.11	89.41	98.82	0
tRNA179	0	0	0	0	0	94.59	0
